# Supplementary material for: Precisely modulated 2D PdCu alloy nanodendrites as highly active peroxidase mimics for the elimination of biofilms
Source: Royal Society of Chemistry journal article supplement (doi:10.1039/d2bm01341j), 2022-01-01
Supplement: d2bm01341j1.pdf [file d2bm01341j1.pdf]

## Supporting Information

# Precisely modulated 2D PdCu alloy nanodendrites as highly active peroxidase mimics for the elimination of biofilms

Guotao Yuan,<sup>#a,b</sup> Shitong Zhang,<sup>#a,c</sup> Zaixing Yang,<sup>a</sup> Shunjie Wu,<sup>a</sup> Huanjun Chen,<sup>d</sup> Xin Tian,<sup>\*a</sup> Si Cheng,<sup>e</sup> Yue Pan,<sup>\*b</sup> and Ruhong Zhou<sup>\*a,f,g</sup>

<sup>a</sup> State Key Laboratory of Radiation Medicine and Protection, School for Radiological and Interdisciplinary Sciences (RAD-X), Soochow University, Suzhou 215123, China

<sup>b</sup> Guangdong Provincial Key Laboratory of Malignant Tumor Epigenetics and Gene Regulation, Guangdong-Hong Kong Joint Laboratory for RNA Medicine, Medical Research Center, Sun Yat-Sen Memorial Hospital, Sun Yat-Sen University, Guangzhou 510120, China

<sup>c</sup> State Key Laboratory of Separation Membranes and Membrane Processes, School of Chemical Engineering and Technology, Tiangong University, Tianjin 300387, China

<sup>d</sup> State Key Laboratory of Optoelectronic Materials and Technologies, Guangdong Province Key Laboratory of Display Material and Technology, School of Electronics and Information Technology, Sun Yat-sen University, Guangzhou 510275, China

<sup>e</sup> National Engineering Laboratory for Modern Silk, College of Textile and Clothing Engineering, Soochow University, Suzhou 215021, China

<sup>f</sup> Institute of Quantitative Biology, College of Life Sciences, Zhejiang University, Hangzhou 310058, China

<sup>g</sup> Department of Chemistry, Columbia University, New York, NY 10027, United States

<sup>#</sup>These authors contributed equally to this work.

<sup>\*</sup> Corresponding authors, E-mail: xtian@suda.edu.cn, panyue@mail.sysu.edu.cn, rz24@columbia.edu

## S1. Experiment section

### S1.1 Materials

All chemicals were of analytical grade. Palladium (II) chloride (PdCl<sub>2</sub>), copper (II) chloride (CuCl<sub>2</sub>, 99%), 3,3,5,5-tetramethylbenzidine (TMB) and terephthalic acid (TA) were purchased from Sigma-Aldrich. Hydrogen chloride (HCl, 35-36%), and ascorbic acid (AA, 99%) were purchased from Sinopharm Chemical Reagent Co., Ltd. Ultrafiltered water used in all the reactions was obtained by using a Millipore purification system. All chemicals were of analytical grade and used without further purification.

### S1.2 Measurement of peroxidase-like activity and steady-state kinetic assays

The peroxidase-like activity of the PdCu nanostructure was measured using TMB as the substrate in the presence of H<sub>2</sub>O<sub>2</sub>. The PdCu nanostructures dispersions were diluted with NaAc buffer (0.2 M, pH = 3.6) as the substrate and then TMB solution (40 mM) and H<sub>2</sub>O<sub>2</sub> (0.1 M) was added. The absorbance of the reaction solution at 652 nm was recorded at different times using a UV spectrometer (UV-3600, Shimadzu, Japan). For the assay of the product, •OH, a fluorescence probe TA (hydroxyterephthalic acid) was added into the reaction solution, and then the fluorescence spectra of the samples were collected using fluorescence spectroscopy (FLS980, Edinburgh). The steady-state kinetic assays were conducted at room temperature in a 200 μL NaAc buffer (0.2 M, pH = 3.6) with PdCu nanostructures (10 μg/mL) as catalysts in the presence of H<sub>2</sub>O<sub>2</sub> and TMB. The kinetic assays of PdCu nanostructures with TMB as the substrate were performed by adding H<sub>2</sub>O<sub>2</sub> (0.1 M) and different amounts of TMB solution. The kinetic assays of PdCu nanostructures with H<sub>2</sub>O<sub>2</sub> as the substrate were performed by adding TMB (40 mM) and different amounts of H<sub>2</sub>O<sub>2</sub> solution. All the reactions were monitored by measuring the absorbance at different reaction times. The apparent kinetic parameters were calculated based on the Michaelis–Menten equation (**Equation 1**):

$$V = V_{\max} \times [S]/(K_m \times [S]) \quad (1)$$

$V$ : initial reaction velocity,  $V_{\max}$ : maximal reaction rate,  $[S]$ : substrate concentration, and  $K_m$ : Michaelis constant.

### S1.3 Density function theory calculation

The Pd(111) surface was first built as a  $p(5 \times 5)$  slab with a thickness of four Pd atom layers (dimension size:  $13.76 \text{ \AA} \times 13.76 \text{ \AA} \times 5.84 \text{ \AA}$ ), and 100 Pd atom was contained in the initial slab model. It has been shown that the  $p(5 \times 5)$  slab is large enough to avoid the interactions between neighboring adsorbed  $\text{H}_2\text{O}_2$  and to fully release the interfacial strain energy. To simulate the effects of the Pd/Cu ratio on the adsorption of  $\text{H}_2\text{O}_2$ , a series of surface models of PdCu alloy were created by substituting Pd atoms with Cu evenly. The number of the replaced Pd ranged from 8 to 13. The neighboring slabs were separated in the direction perpendicular to the surface by a vacuum region of  $20 \text{ \AA}$ , and only the bottom atoms in the slab were frozen to their crystal lattice positions.

DFT calculations were performed using Dmol software with the conductor-like screening model (COSMO). The exchange-correlation potential was described by the revised Perdew-Burke-Ernzerhof (rPBE) generalized gradient approach (GGA), which improves the calculated adsorption energetics. The atomic orbitals were represented by a double numerical basis set plus polarization function (DNP). The SCF convergence criterion was set at  $1.0 \times 10^{-6}$  hartree/atom and the convergence criterion for structure optimization at  $1.0 \times 10^{-5}$  Hartree/bohr. Brillouin zone sampling was performed using a  $4 \times 4 \times 1$  k-point mesh. The adsorption energy is defined as **Equation 2**:

$$E_{\text{ads}} = E(\text{slab} + \text{H}_2\text{O}_2) - [E(\text{slab}) + E(\text{H}_2\text{O}_2)] \quad (2)$$

where  $E(\text{slab} + \text{H}_2\text{O}_2)$  represents the energy of the optimized slab model with adsorbed  $\text{H}_2\text{O}_2$ ;  $E(\text{slab})$  and  $E(\text{H}_2\text{O}_2)$  denote the energies of the separately optimized slab and  $\text{H}_2\text{O}_2$ , respectively.

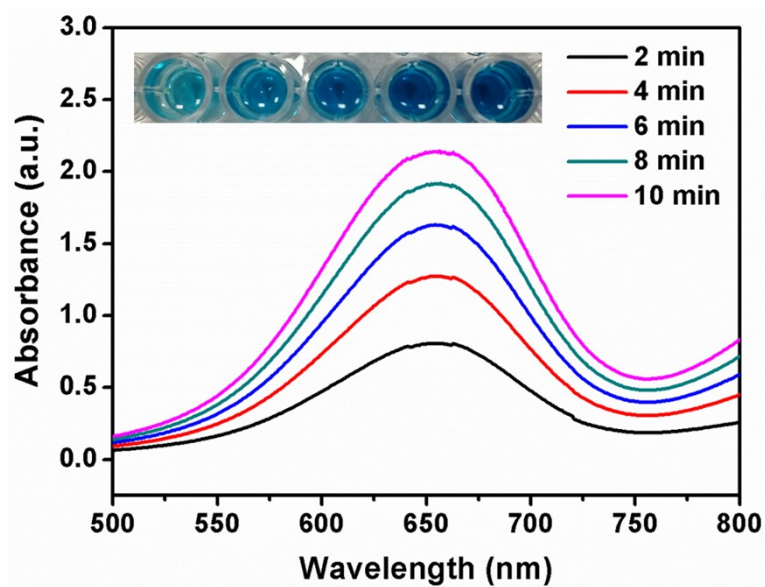

**Fig. S1** UV-vis spectroscopy of samples containing 40 mM TMB, 0.1 M H<sub>2</sub>O<sub>2</sub>, and 10 μg/mL Pd<sub>9</sub>2Cu NDs in 0.2 M acetate buffer (pH 3.6) for 10 min. The wells (inset) show the color change of TMB at different time points.

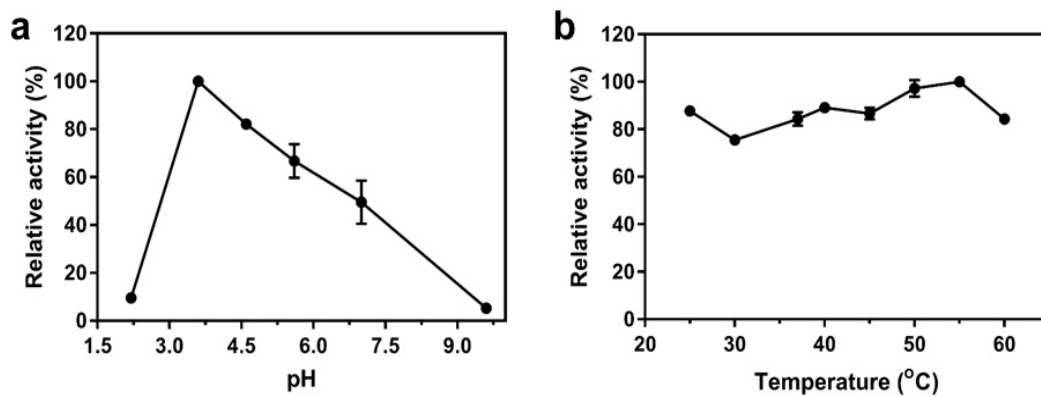

**Fig. S2** Effects of (a) pH and (b) temperature on peroxidase-like activity of Pd<sub>9.2</sub>Cu NDs. [H<sub>2</sub>O<sub>2</sub>] = 0.1 M, [Pd<sub>9.2</sub>Cu NDs] = 10 μg/mL, [TMB] = 40 mM.

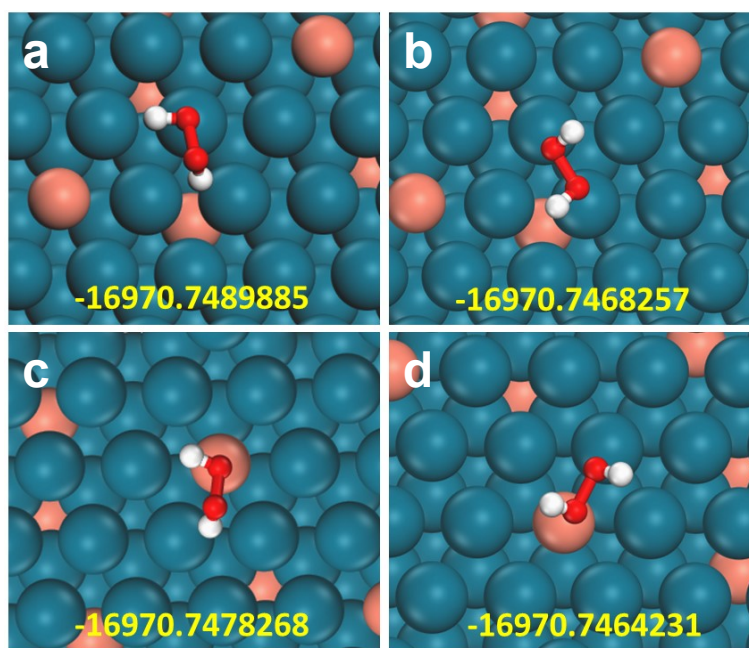

**Fig. S3** Adsorptions of  $\text{H}_2\text{O}_2$  on  $\text{Pd}_{11.5}\text{Cu}$  (111) surface at Pd-top and Cu-top sites with two typical orientations: (a)  $\text{H}_2\text{O}_2$  adsorbed on Pd with O-O tilt to the alloy surface (white, H; red, O; cyan, Pd). (b)  $\text{H}_2\text{O}_2$  adsorbed on Pd with O-O parallel to the alloy surface. (c)  $\text{H}_2\text{O}_2$  adsorbed on Cu with O-O tilt to the alloy surface. (d)  $\text{H}_2\text{O}_2$  adsorbed on Cu with O-O parallel to the alloy surface. The calculated total energy (yellow text; unit: Hartree) suggests that  $\text{H}_2\text{O}_2$  prefers to adsorb on Pd with O-O tilt to the alloy surface.

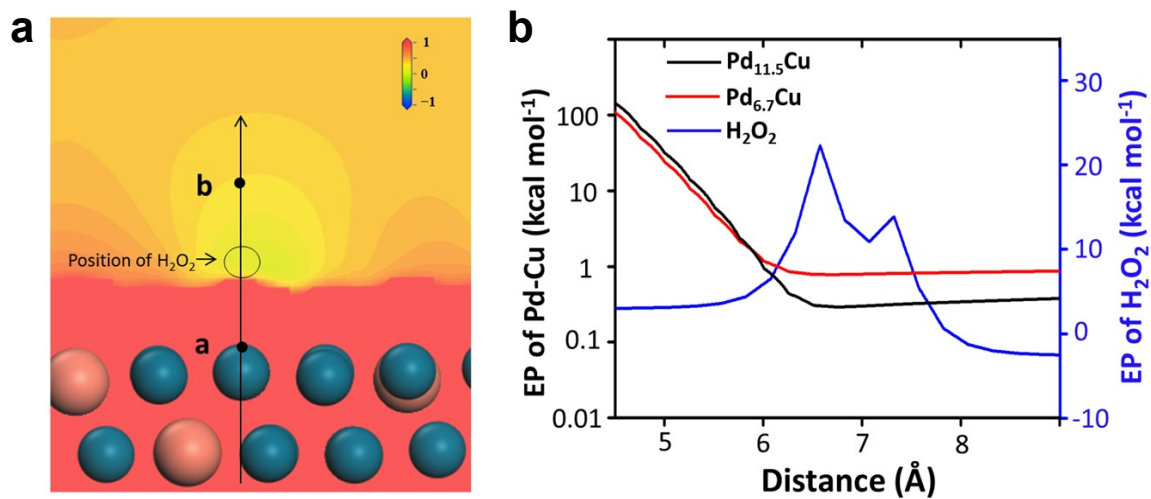

**Fig. S4** (a) The EP of Pd<sub>11.5</sub>Cu slab model (white, H; red, O; cyan, Pd). (b) the separately scanned EP of Pd<sub>11.5</sub>Cu, Pd<sub>6.7</sub>Cu and H<sub>2</sub>O<sub>2</sub> along the path denoted in panel (a).

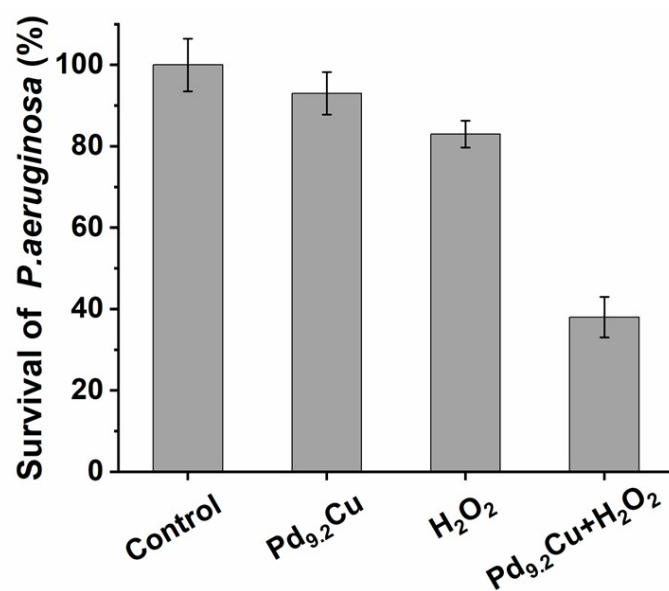

**Fig. S5** Antibacterial activity of Pd<sub>9.2</sub>Cu NDs in killing *P. aeruginosa*.
